# Supplementary material
Source: PubMed Central journal article supplement (PMC3886671)

## Supplemental Data

An LC/MS/MS method for stable isotope dilution studies of  $\beta$ -carotene bioavailability, bioconversion and vitamin A status in humans. Oxley, Berry, Taylor, Cowell, Hall, Hesketh, Lietz, Boddy.

**Fig. I.**

Flow-injection APCI-MS/MS product ion mass spectra of  $m/z$  537 *all-trans*- $\beta$ -carotene (A) and  $m/z$  537 *9-cis*- $\beta$ -carotene (B) in positive mode.

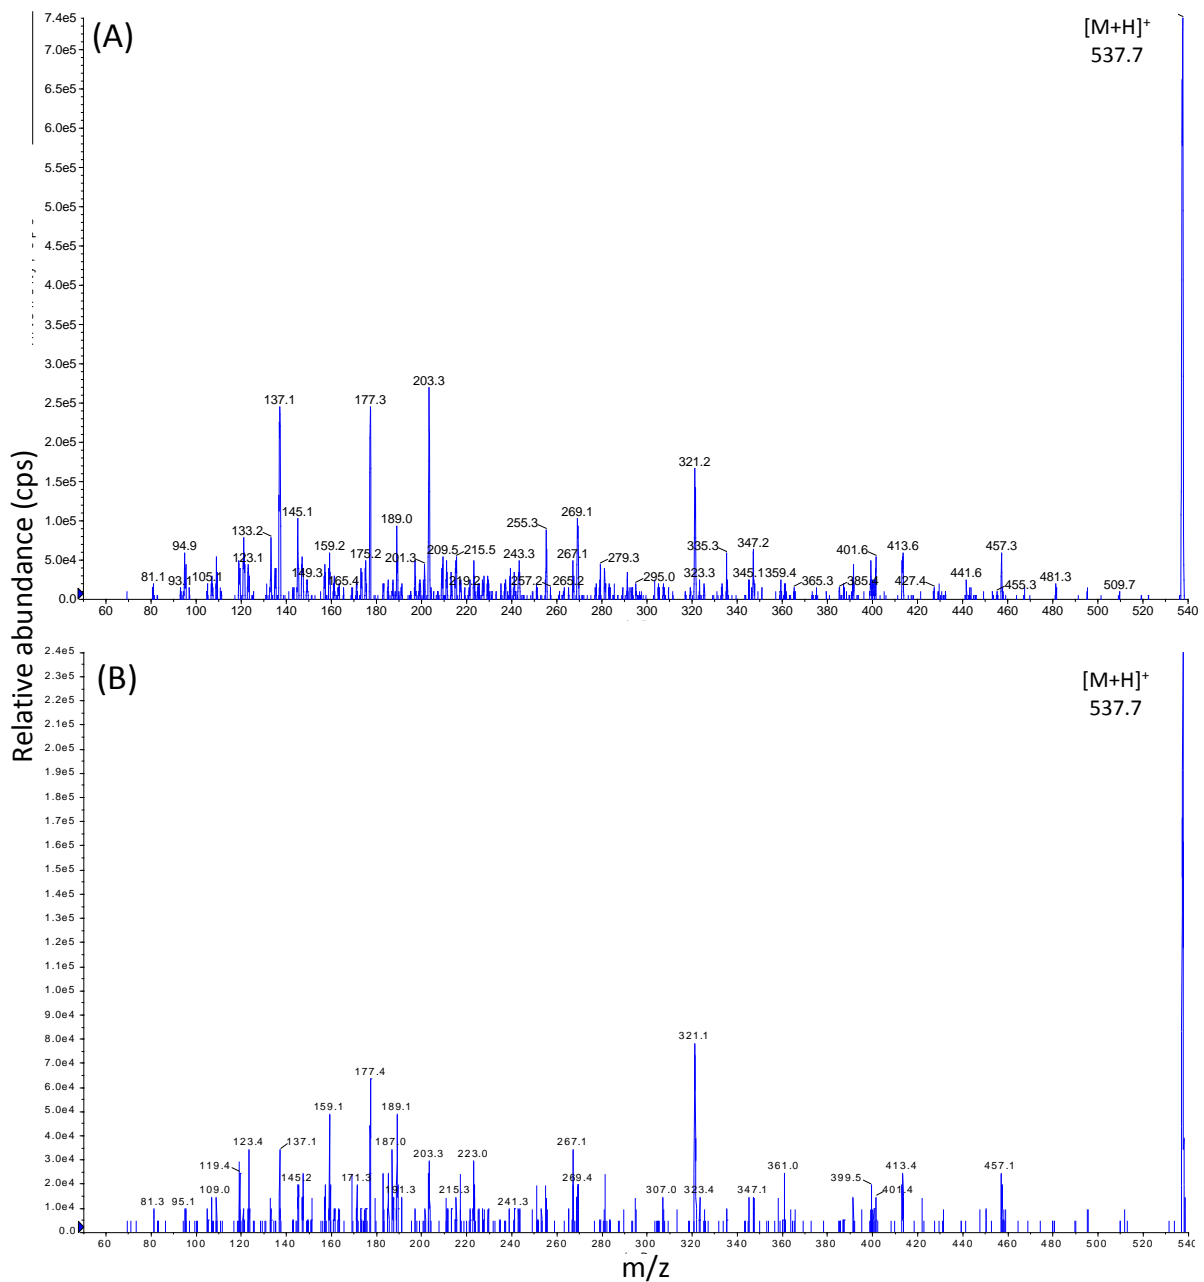

Supplement: supp_D040204_jlr.D040204-1.pdf [file supp_D040204_jlr.D040204-1.pdf]
