# Supplementary material
Source: PubMed Central journal article supplement (PMC3886671)

## Supplemental Data

An LC/MS/MS method for stable isotope dilution studies of  $\beta$ -carotene bioavailability, bioconversion and vitamin A status in humans. Oxley, Berry, Taylor, Cowell, Hall, Hesketh, Lietz, Boddy.

**Fig. II.**

External calibration curves for [ $^{12}\text{C}$ ] carotene and retinoid species used for quantitation of analytes.

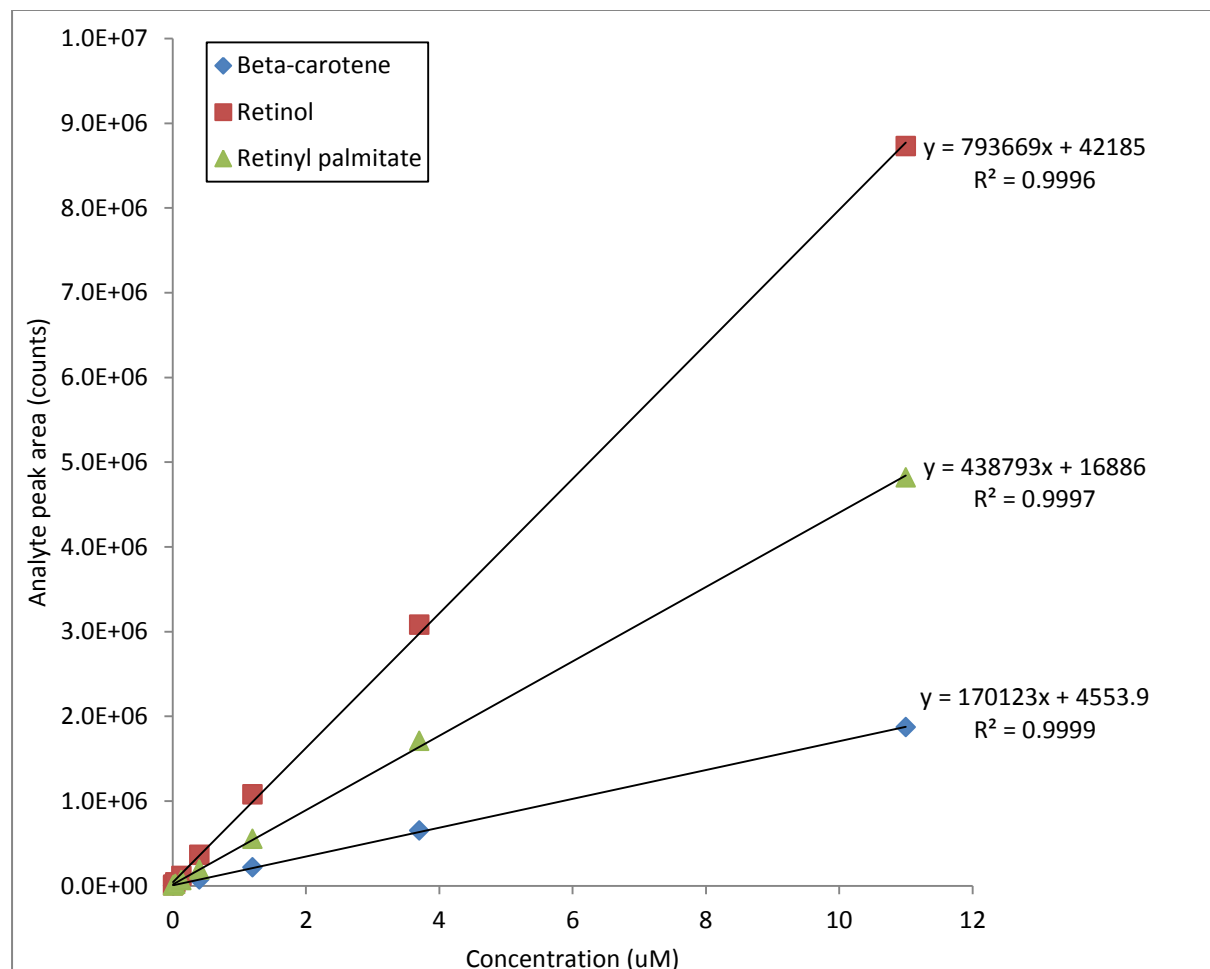

Supplement: supp_D040204_jlr.D040204-2.pdf [file supp_D040204_jlr.D040204-2.pdf]
